# Supplementary material for: 33 million year old Myotis (Chiroptera, Vespertilionidae) and the rapid global radiation of modern bats
Source: PLoS One. 2017 Mar 8;12(3):e0172621. doi: 10.1371/journal.pone.0172621 (PMC5342209; doi:10.1371/journal.pone.0172621)
Supplement: S1 File — (TNT) [file pone.0172621.s001.tnt]

nstates num 6;
xread
'File output by Morphobank v3.0 (http://www.morphobank.org); 2017-01-6 15.22.00'
280 28

Onychonycteris_finneyi                 00000--0100000000100100010-00-1110--10000121?0100221100202??001110?0120?0?0011001000-?0-0???0101110-021?????????0011111-03????300010?111??101?10????00??1001110??1??200-0001001000[21]10110043110?3002--0--00-1-200110010-02010000-?01000001-101001020010??0?11?00-00210011000010101220??12
Miniopterus_schreibersii_gfg_          11004--0100110000100001120001-1210--0003-----020121100000210101110001120010001101012100-0111010014-0010003110111001014-0020101101010010111101000010000011102100002110001000010100010000113201003121110---0-102001300130-2001101-00100001101000021-00101101112111000100010010100001101011
Scotoecus_albofuscus                   111-----------0-011000212010211000--0013-----------------2111000-0001220010001101002000-01100100120-02001212-4-00010120-0210-14-00100101110010000100000110011001020110111----02-0011011103202-031200111100-002001300130-2000001-00100001101010011-00101100010011000100000010100002101011
Mystacina_robusta                      00000--00-10--1----0001130000-1112001003----?010021110011212000110100220000001001000-00-0111010004-002001010-200001004-00310-120001001011110-000010001----1--100120110211----02-001000110300100311001111-0-1-2101200131-2001101-001000011-1110020100001101011211001000010010000001201012
Mystacina_tuberculata                  00000--00-?0--1----0000130000-1111001003----?010121110001212100110100220000001001000-00-0111000--30-02001010-200001004-00310-130001001011110-000010001----1--100120120111----02-001000110300100312001110-0-1-2101100131-2001101-001000011-0110020100001111012211001000010010000001201012
Mystacina_miocenalis                   ??????????????????????????????????????????????????????????????????????10?10001001000-00-00?10100030-02001010-200001004-00210-1300???????????????????????????????????????????????????????????????????????????????????????????????????????????????????????????????????????????????????????
Myzopoda_aurita                        11000--10-01000[01]0100101120001-1111--10100122?0200200-010021000010020222001001[10]101002110-01?1000--20-01100010-4--0010021-0300-14--01100--1100-00000-1000020011111030110210001002-001000-10431100-110000---0-102002200131-2000201-001100011-1010020200001111011211001000010000000001201011
Myzopoda_schliemanni                   11000--10-0100010100101120000-1110--10100132?0200200-0100210000100202220010010101002110-01?00100020-01100010-4--0010021-0300-14--01100--1100-00000-1000121011111030110210000002-[01]01000-10431100-100000---0-102002200131-2000201-001100111-1010021-00001111011111000000010010000001201011
Phasmatonycteris_phiomensis            ?????????????????????????????????????????????????????????????????????????????????????????????????????????????????????????????????????????????????????????????????????????????02-0?1000-1043110?-120000---????2?02200130-2010201-00100001?-1010021-000011110122110000000100100000012001-2
Phasmatonycteris_butleri               ??????????????????????????????????????????????????????????????????????????????????????????????????????????????????????????????????????????????????????????????????????????????????????????????????????????????????00131-2010201-001000011-???????????????????111000000010010000001200012
Natalus_stramineus                     0000201---111001010010011?-00?1110--10000120?000020???010310020100200220010001001002000-01?10100130-02102012-300001104-00210-14--000?1111100-0000102000110011101030100210000201000100010010010?2120000---0-1-2101200131-2000?01-00000001111210010200101101011211002000010000001012200011
Miniopterus_schreibersii               00000--00-101000000000212?002?1110--1003----?010020???0003120001001012200?0011001002100-01?1010114-002002012-211001104-1020101210020?1011120-010010200??100110000202100-0001202-011???11043010?2120000---11102001200130-2000?01-001000001-1110010200??1101011211001??0010010??1011200012
Cistugo_lesueuri                       11000--010101000010000012?000?1111--10010-41?020020???0002101011110012200?0011001012100-01?1010004-102102010-300001104-10210-1300010?1011101-000010200??10021100010210210001002-001???11043010?3120000---11102001301131-2000?01-011000001-1110010200??1101011211000??0010010??1001-01012
Khonsunycteris_aegypticus              ????????????????????????????????????????????????????????????????????????????????????????????????????????????????????????????????????????????????????????????????????????????????????????????????????????????????????????????????????????????????????????????????????????????????????????
Nyctalus_noctula                       1100021110111001010001101[01]000-1100--1103----?022110100000212010101001210010011101012100-0011010014-10100010104-0001014-0020[01]004-00100101111010000102000111010201031210211----0??001100110311??00020000--011102001300030-2000201-010?0001111010010-000?110?00[10]011000??0000000??0002201011
Pipistrellus_pipistrellus              10002201111[23]10000100000121001-1111--0003----?021120100[01]00212111100101210010011001002100-0010010014-0010022110301001014-00221013010100101111000000[12]0[12]000111011101000211111----0??001101111321??000[12]0010--010102001300130-2000[01]01-01000001111010011-0000110?00[23]011000000000000000002201011
Barbastella_barbastellus               1000221-[01]1112001110000[01]01[01]101-1100--0113----?0?2[012][012]0[01]0000031[01]101101101210011011101012110-00100100111-0[12][01]00110-4-00010[01]21-0[23]00-14-0010000011[12]110100222000[12][01][01]0112010112[01]0211----02?0010001104301?03120100--0011-2001201131-1001221-00010001101010011-001011001021110001001000101000022011-0
Plecotus_austriacus                    00002201101230000101000030000-2110--1103----?0?[01]02010010021100010020[01]110010010001002100-0110010004-002001010-4--001014-00210-14--01100--111110000102000111011100021211110?0000??001000110430??02020100--011102001300131-?0[01]1121-010000011?10[01]0011-0000110?002?11000000000010000002201[01]12
Quinetia_misonnei                      ??????????????????????????????????????????????????????????????????????10?10010001002100-0100010004-002001010-4--001014-10210-14--0?????????????0?????0????0?1???????????00???02-00??????????1002020100--00-102001300130-100??21-0000000[01]101??0011-00001102001011001000000010000002201012
Myotis_myotis                          00000--01[01]0210000[01]00001020000-1110--1101?122?02102[01]1000002100001[01]0[21]00210010000001002110-0110010104-002[01]0[01]01104--001014-10201014--0210101111110000[12]02000111011100010201110?0010??00110?110330??03120100--00-102101100131-2000121-010000011?111002020000110100[12]211001000000010000002100012
Myotis_belgicus                        ????????????????????00?020000-1110--110??????????????????2100001[10]01???10?10010001002110-0110010104?002101010-4--0????????????????021010111111000?????0????0?1????[12]0201110000002-0011001104301003120100--00-1020[01]1200131-2010121-00000001111110010200001101002111001000000010000002200011
Myotis_daubentonii                     10000--011[01]2[01]0000100000020000-1110--1100?122?0?002010010021[12]00[01]101101220010011001002100-0111010[01]14-001[01]010[01]10301001014-0021101301010010111[12]0[01]0000[12]02000111011101000201210?0000???[01]?000110430??02120000--00-102001300131-2010[12]01-000000011?1110011-0000110?10[123]1110010001000[01]0000002201011
Eptesicus_nilssonii                    0000221-01121000010000102[01]101-1110--1003----?1-----------[23]0[12]100110101210010010001002000-0010010014-[01]01[01]0[12]0110301001014-002110130101000--1110[01]0000102000111011201020111111----0??001101-10320??0[23]1[21]0100--011101001200131-20100[02]1-010000010?1110011-0000110?002111001000010010000001201001
Eptesicus_furinalis                    0000220---1330010000002030100?1110--1003-----1-----------2021001100012200?0000001002100-01?1000014-002002010-3000010121-0220-1300020?011?1-01000011000??11011001010111111----02-002???-1032010?3110000--?0-0-1112210131-2010?01-00001001001110011-00??1100110011001??0110010??0002200012
Hypsugo_savii                          1000221-001[23]10000100000020000-1111--1103----?[01]222000-0000212010100101210010010101002000-0[01]10010014-001000011030100[01][10]14-002010030101000--011010000102000111011101011111111----0??001101-10401??0[12]110010--011101001300131-1010001-000000010?1110011-0000110?01[12]011001000010000000001201001
Vespertilio_murinus                    0000221011133000010000[01]02[12]000-1110--1103----?1-----------[23]1200[01]100001210010000101002100-0110010004-0010000110312001[01]14-00201013110[01]00101111110000[12]0200011101110[01]021111111----0??001101110430??02120000--011101001300131-1011101-010000011?1110011-0000110?01[12]1110010000100[01]00[01]0001201001
Chaerephon_jobensis                    01000--01011--1----0001121001-1111--0003----?02002110000021210011000121001001[01]001000-00-0110010004-0020002110111001004-102010111101001001120100000-20000111--000031210111----01200100111132011?31210111000-1-2001200130-2?00021-010010111110100101000011110000110000000000100000021011-2
Austronomus_australis                  11000--11011--1----0001120000-111[01]--1003----?020110--0120212101110001110010010001000-00-0110010004-3021000110011001004-102010110101001001[10]20100000-20000111--000031210111----01200100111012010?2120001100111?2001200130-2?0[01]101-01000011111010010100101101000011000100000010100002201011
;


cnames
{ 0 Upper_incisors_direction_of_projection_of_tooth_shaft orthodont proodont;
{ 1 Upper_incisors_orientation_of_tip_of_crown orthoclivous retroclivous;
{ 2 Upper_I1_presence I1_present absent I1_absent;
{ 3 Upper_I1_crown_differentiation crown_clearly_differentiated_from_root_shaft_ not_differentiated_from_root_shaft;
{ 4 Upper_I1_shape_of_occlusal_margin large_main_cusp_that_tapers_to_a_blunt_point_additional_lateral_cusp_may_be_present_ straight_or_slighlty_convex_and_rounded bilobed trilobed blade_like_with_concave_C_shaped_cutting_edge;
{ 5 Upper_I1_form_of_lobes mesial_lobe_smaller_than_distal_lobe lobes_of_equal_size mesial_lobe_larger_than_distal_lobe;
{ 6 Upper_I1_direction_of_lobe_projection ventrally mesially;
{ 7 Upper_I1_position_of_pointed_main_cusp main_cusp_offset_mesially_from_axis_of_tooth main_cusp_in_center_of_tooth_so_tooth_crown_is_roughly_bilaterally_symmetrical_ main_cusp_offset_distally_from_axis_of_tooth;
{ 8 Upper_I1_distal_accessory_cusp absent present;
{ 9 Upper_I1_relative_size_of_pointed_mesial_cusp mesial_cusp_2x_the_height_of_distal_cusp pointed_mesial_cusp_only_slightly_higher_than_distal_cusp;
{ 10 Upper_I1_lingual_cingulum_presence absent present;
{ 11 Upper_I1_occlusion I1_in_contact_with_i1_or_separated_by_a_small_gap_when_cheek_teeth_are_in_occlusion I1_separated_from_i1_by_a_large_gap_when_cheek_teeth_are_in_occlusion I1_occludes_with_mesial_side_of_i2 I1_occludes_with_anterior_cingulum_of_lower_canine. I1_occludes_with_cingular_shelf_on_lower_canine_well_posterior_to_i1 I1_occludes_posterior_to_i1_in_mandibular_fossa;
{ 12 Upper_incisors_relative_crown_height height_of_I1_less_than_height_of_I2 I1_and_I2_subequal_in_height height_of_I1_greater_than_height_of_I2_but_less_than_twice_the_height_of_I2 height_of_I1_at_least_twice_that_of_I2;
{ 13 Upper_I2_occlusal_exposure I2_in_normal_position_between_I1_and_C_not_excluded_from_occlusion_toothrow I2_moved_dorsally_and_excluded_from_occlusal_toothrow_by_close_apposition_of_I1_and_C I2_moved_ventrally_and_excluded_from_occlusal_toothrow_by_close_apposition_of_I1_and_C;
{ 14 Upper_I2_presence I2_present absent I2_absent;
{ 15 Upper_I1_and_I2_relative_position I2_located_more_posterior_than_I1 I2_lateral_to_I1_not_displaced_posteriorly_or_anteriorly_incisors_form_transverse_line I2_displaced_anteriorly;
{ 16 Upper_I2_crown_morphology well_developed_crown_morphology simplified;
{ 17 Upper_I2_lingual_cingulum_presence absent cingulum_present;
{ 18 Upper_I2_and_C_diastema_presence diastema_present diastema_absent_between_I2_and_C_teeth_in_contact;
{ 19 Upper_C_crown_height upper_C_greater_than_or_equal_to_twice_the_height_of_I1 upper_C_much_less_than_twice_the_height_of_I1;
{ 20 Upper_C_crown_proportions not anteroposteriorly_elongated;
{ 21 Upper_C_labially_swollen not upper_C_labially_swollen;
{ 22 Upper_C_anteromedial_accessory_cusp no_raised_cingulum_or_cusp raised_cingulum_present_but_cusp_absent cusp_present_but_low cusp_tall_greater_than_half_height_of_main_cusp;
{ 23 Upper_C_anteromedial_groove groove_absent anteromedial_groove_present;
{ 24 Upper_C_lingual_cingulum_ lingual_cingulum_absent faint_lingual_cingulum_present narrow_well_developed_cingulum_present wide_well_developed_cingulum_present;
{ 25 Upper_C_lingual_cingulum_indentation absent weakly_developed strongly_developed;
{ 26 Upper_C_lingual_cingulum_cusp absent present;
{ 27 Upper_C_lingual_cingulum_slope not_steep steep;
{ 28 Upper_C_labial_cingulum_development cingulum_well_developed_and_complete cingulum_weakly_developed_but_complete cingulum_weakly_developed_and_incomplete cingulum_absent;
{ 29 Upper_C_labial_cingulum_incompleteness incomplete_anteriorly incomplete_in_the_middle incomplete_posteriorly;
{ 30 Upper_C_distal_cingulum absent cingulum_small large;
{ 31 Upper_C_posteromedial_ridge ridge_absent posteromedial_ridge_present two_posteromedial_ridges_present_forming_a_groove;
{ 32 Upper_C_posterolingual_surface rounded posterolingual_surface_flattened;
{ 33 Upper_C_posterolateral_accessory_cusp cusp_absent trace_of_cusp_present cusp_tall_and_conspicuous_but_less_than_half_the_height_of_the_main_cusp cusp_very_tall_equal_to_or_greater_than_half_the_height_of_the_main_cusp;
{ 34 Upper_C_posterolateral_accessory_cusp_form conical_and_well_separated_from_main_cusp bladelike;
{ 35 Upper_C_posterolateral_accessory_cusp_position cusp_located_on_posterior_cingulum_well_seperated_from_main_canine_cusp cusp_originates_on_posterior_face_of_main_canine_cusp_not_well_seperated_from_that_cusp;
{ 36 Upper_C_posterolabial_surface rounded posterolabial_surface_flattened;
{ 37 Upper_C_curvature less_recurved more_recurved;
{ 38 Upper_C_angle_of_projection does_not_project_anteriorly_long_axis_of_tooth_shaft_is_perpendicular_to_plane_of_occlusal_surface_of_molar_toothrow projects_anteriorly_long_axis_of_tooth_shaft_forms_an_oblique_angle_with_the_plane_of_the_occlusal_surface_of_the_molar_toothrow;
{ 39 Upper_P1_development P1_with_well_developed_crown_that_is_greater_in_diameter_than_the_root_crown_conical_triangular_or_lenticular_in_labial_view P1_peglike_crown_simplified_and_flattened_crown_diamenter_subequal_to_or_only_slightly_larger_than_root_diameter P1_present_as_a_tiny_spicule_with_crown_diameter_less_then_or_equal_to_root_diameter P1_absent;
{ 40 Upper_P1_number_of_roots 1_root 2_roots;
{ 41 Upper_P1_labial_cingulum_presence absent labial_cingulum_present;
{ 42 Upper_P1_position P1_labially_extruded_from_toothrow_P5_directly_contacts_tooth_anterior_to_it_usually_C_while_P1_is_located_labial_to_this_contact P1_partially_extruded_from_toothrow_on_labial_side_but_still_partially_separates_teeth_anterior_and_posterior_to_it. P1_lies_in_line_with_C_P5_and_M1_2 P1_partially_extruded_from_toothrow_on_lingueal_side_but_still_partially_separates_teeth_anterior_and_posterior_to_it P1_lingually_extruded_from_toothrow_P5_directly_contacts_tooth_anterior_to_it_usually_C_while_P1_is_located_lingual_to_this_contact;
{ 43 Upper_P1_and_P4_relative_crown_length P1_shorter_than_P4 P1_and_P4_subequal P1_longer_than_P4;
{ 44 Upper_dP4_molariform dP4_molariform hooklike_or_spicule_not_molariform;
{ 45 Upper_P4_presence P4_present absent P4_absent;
{ 46 Upper_P4_number_of_roots three_roots two_roots one_root;
{ 47 Upper_P4_position P4_lies_in_line_with_C_P5_and_M1_2 P4_partially_extruded_from_toothrow_but_still_partially_separates_teeth_anterior_and_posterior_to_it P4_entirely_extruded_from_toothrow_P5_directly_contacts_tooth_anterior_to_P4_usually_C_;
{ 48 Upper_P4_labial_cingulum_development labial_cingulum_well_developed weakly_developed absent;
{ 49 Upper_P4_lingual_cingulum cingulum_absent weakly_developed well_developed;
{ 50 Upper_P4_lingual_cusp absent_no_cusp_or_cingulum raised_cingulum_present_but_no_cusp cusp_present;
{ 51 Upper_P4_postparacrista absent single_crest pair_of_roughly_parallel_crests_with_a_groove_in_between;
{ 52 Upper_P4_postparacrista_extent postparacrista_decreases_sharply_in_height_near_paracone_and_does_not_extend_to_distal_edge_of_tooth postparacrista_extends_as_a_continuous_crest_to_the_distal_aspect_of_the_tooth;
{ 53 Upper_P4_distal_accessory_cusps distal_accessory_cusps_absent one_distal_accessory_cusp_present two_distal_accessory_cusps;
{ 54 Upper_P4_and_P5_diastema_presence no_diastema_present_between_P4_and_P5_teeth_in_contact_or_nearly_so diastema_present;
{ 55 Upper_P4_and_P5_relative_crown_length P4_shorter_than_P5 P4_and_P5_subequal P4_longer_than_P5;
{ 56 Upper_P4_and_P5_relative_crown_height P4_shorter_than_P5 P4_and_P5_subequal_in_height P4_taller_than_P5;
{ 57 Upper_P5_lingual_cingulum_development cingulum_absent lingual_cingulum_narrow_no_lobe_present lingual_cingulum_large_forms_distinct_lobe_does_not_extend_as_far_lingually_as_protocone_of_M1. lingual_cingulum_very_large_forms_distinct_lobe_extends_as_far_lingually_or_farther_than_protocone_of_M1.;
{ 58 Upper_P5_anterior_margin_ narrow wide;
{ 59 Upper_P5_lingual_cingular_cusp cingulum_with_raised_edge_but_no_cingular_cusp lingual_cusp_weakly_developed lingual_cusp_well_developed two_well_developed_lingual_cusps;
{ 60 Upper_P5_labial_cingulum_development labial_cingulum_well_developed weakly_developed absent;
{ 61 Upper_P5_labial_cingular_cusp cusp_absent weakly_developed strongly_developed;
{ 62 Upper_P5_anterolabial_cusp absent weakly_developed strongly_developed;
{ 63 Upper_P5_postparacrista absent single_crest pair_of_roughly_parallel_crests_with_a_groove_in_between;
{ 64 Upper_P5_postparacrista_extent postparacrista_decreases_sharply_in_height_near_paracone_and_does_not_extend_to_distal_edge_of_tooth postparacrista_extends_as_a_continuous_crest_to_the_distal_aspect_of_the_tooth;
{ 65 Upper_P5_distal_accessory_cusps distal_accessory_cusps_absent one_distal_accessory_cusp_present two_distal_accessory_cusps;
{ 66 Upper_P5_proportions_in_occlusal_view P5_length_less_than_width length_and_width_subequal P5_length_greater_than_width;
{ 67 Upper_P5_and_M1_diastema_presence no_diastema_between_P5_and_M1_teeth_in_contact diastema_present;
{ 68 Upper_P5_and_M1_M2_alignment not_aligned_longitudinal_axis_through_M1_and_M2_paracone_runs_markedly_labial_to_P5_paracone_ aligned_longitudinal_axis_through_M1_and_M2_paracones_intersects_P5_paracone_ not_aligned_longitudinal_axis_through_M1_and_M2_paracone_runs_markedly_lingual_to_P5_paracone_;
{ 69 Upper_P5_and_M1_relative_length P5_length_conspicuously_greather_than_M1_length P5_and_M1_subequal_in_length P5_length_conspicuously_less_than_M1_length;
{ 70 Upper_molars_ectocingulum_development strongly_developed present_but_weak absent;
{ 71 Upper_molars_pericone_presence absent pericone_present;
{ 72 Upper_M1_and_M2_diastema_presence no_diastema_present_between_M1_and_M2_teeth_in_contact diastema_present;
{ 73 Upper_M1_and_M2_lingual_cingulum absent present;
{ 74 Upper_M1_and_M2_stylar_shelf_presence stylar_shelf_present_on_M1_and_M2 absent;
{ 75 Upper_M1_and_M2_protocone_presence present absent;
{ 76 Upper_M1_and_M2_protocone_and_paracone_relative_height protocone_shorter_than_paracone protocone_and_paracone_subequal_in_height;
{ 77 Upper_M1_and_M2_metacone_and_paracone_relative_height metacone_taller_than_paracone metacone_and_paracone_subequal_in_height metacone_shorter_than_paracone;
{ 78 Upper_M1_and_M2_protocone_sharpness_and_inclination less_sharp_and_less_inclined_anteriorly more_sharp_and_more_inclined_anteriorly;
{ 79 Upper_M1_and_M2_metacone_and_paracone_inclination not paracone_and_metacone_lingually_inclined;
{ 80 Upper_M1_and_M2_angle_between_postparacrista_and_premetacrista very_acute_cristae_nearly_or_completely_parallel_angle_is_20_degrees_or_less_ acute_cristae_lie_at_acute_angle_to_one_another_angle_21_90_degrees_ oblique_cristae_meet_at_an_angle_somewhat_more_than_a_right_angle_angle_91_120_degrees_ very_oblique_cristae_nearly_or_completely_form_straight_line_angle_well_over_120_degrees_;
{ 81 Upper_M1_and_M2_postparacrista_and_premetacrisita_contact postparactista_contacts_premetacrista_on_labial_aspect_of_tooth_trigon_closed_labially postparacrista_does_not_contact_premetacrista_trigon_open_labially;
{ 82 Upper_M1_and_M2_trigon_width_and_depth wide_and_shallow narrow_and_deep;
{ 83 Upper_M1_and_M2_mesostyle_presence_and_location mesostyle_absent mesostyle_formed_at_labial_terminus_of_postparacrista mesostyle_formed_at_point_of_contact_of_postparacrista_and_premetacrista mesostyle_formed_at_labial_terminus_of_premetacrista;
{ 84 Upper_M1_and_M2_mesostyle_size_and_labial_extent large_and_extended_labially small_and_less_labially_extended;
{ 85 Upper_M1_and_M2_lingual_displacement_of_contact_between_postparacrista_and_premetacrista_ not_lingually_displaced_lies_in_line_with_parastyle_and_metastyle somewhat_lingually_displaced strongly_lingually_displaced;
{ 86 Upper_M1_and_M2_mesostylar_crest_presence absent present;
{ 87 Upper_M1_and_M2_mesostylar_crest_direction projects_mesiolabially projects_distolabially;
{ 88 Upper_M1_and_M2_cuspule_on_premetacrista_presence cuspule_absent cuspule_present_on_premetacrista;
{ 89 Upper_M1_and_M2_paraconule_presence paraconule_present absent;
{ 90 Upper_M1_and_M2_metaloph_presence Metaloph_present absent;
{ 91 Upper_M1_and_M2_secondary_cusp_on_postprotocrista absent present;
{ 92 Upper_M1_parastyle_presence present absent;
{ 93 Upper_M1_parastyle_form conical crest;
{ 94 Upper_M1_parastyle_separation_from_preparacrista not_separated separated;
{ 95 Upper_M1_parastyle_length short long;
{ 96 Upper_M1_parastyle_curvature straight curved;
{ 97 Upper_M1_ectoflexus ectoflexus_absent single_ectoflexus_present_labial_to_mesostyle single_ectoflexus_present_between_mesostyle_and_parastyle_pre_ectoflexus_ single_ectoflexus_present_between_mesostyle_and_metastyle_postectoflexus_ pair_of_ectoflexi_present_one_between_mesostyle_and_parastyle_one_between_mesostyle_and_metastyle;
{ 98 Upper_M1_single_ectoflexus_development shallow_ectoflexus_present deep_ectoflexus_present;
{ 99 Upper_M1_double_ectoflexus_development both_shallow anterior_deep_posterior_shallow anterior_shallow_posterior_deep both_deep;
{ 100 Upper_M1_preparacrista_presence present absent;
{ 101 Upper_M1_relative_length_of_preparacrista_and_postparacrista preparacrista_longer_than_postparacrista preparacrista_subequal_in_length_to_postparacrista preparacrista_shorter_than_postparacrista;
{ 102 Upper_M1_relative_length_of_postmetacrista_and_premetacrista postmetacrista_length_subequal_to_premetacrista_length postmetacrista_longer_than_premetacrista_but_not_twice_as_long postmetacrista_2x_as_long_as_premetacrista_or_longer;
{ 103 Upper_M1_trigon_basin_surface_texture enamel_smooth surface_with_striations_or_small_enamel_folds;
{ 104 Upper_M1_postprotocrista_orientation oriented_distolabially_toward_metacone_metaconule_or_metastylar_region oriented_toward_midpoint_between_metastyle_metacone_and_hypocone_region oriented_anteroposteriorly_toward_hypocone_or_hypocone_region;
{ 105 Upper_M1_postprotocrista_extent_ postprotocrista_extends_only_to_metaconule_region_irregardless_of_presence_absence_of_metaconule_does_not_reach_metacone_or_metacingulum joins_lingual_base_of_metacone postprotocrista_extends_to_hypoconal_region extends_to_become_confluent_with_metacingulum_or_edge_of_hypocone_shelf;
{ 106 Upper_M1_metaconule_presence metaconule_present absent;
{ 107 Upper_M1_endoloph_presence absent present_approaches_postprotocrista_at_an_angle present_but_continuous_with_postprotocrista_as_a_single_straight_crest_along_lingual_side_of_tooth present_does_not_approach_postprotocrista_runs_lingually;
{ 108 Upper_M1_endoloph_contact_with_postprotocrista endloloph_contacts_postprotocrista_ no_contact;
{ 109 Upper_M1_hypocone_shelf_development hypocone_shelf_very_large_maximum_mesiodistal_lenght_equal_to_or_greater_than_distance_between_paracone_and_metacone hypocone_shelf_large_maximum_mesiodistal_length_greater_than_half_the_distance_between_paracone_and_metacone_but_not_100_of_that_distance hypocone_shelf_small_well_developed_and_clearly_distinct_from_trigon_maximum_mesiodistal_length_less_than_half_the_distance_between_the_paracone_and_metacone hypocone_shelf_very_small_present_as_a_cingulum_but_may_not_be_clearly_distinguished_from_the_trigon hypocone_shelf_absent;
{ 110 Upper_M1_hypocone_shelf_width narrower wider;
{ 111 Upper_M1_hypocone_development hypocone_absent hypocone_incipient_or_poorly_developed_but_not_entirely_absent hypocone_well_developed;
{ 112 Upper_M2_presence M2_present absent;
{ 113 Upper_M2_parastyle_presence present absent;
{ 114 Upper_M2_parastyle_form conical crest;
{ 115 Upper_M2_parastyle_length short long;
{ 116 Upper_M2_parastlye_curvature straight curved;
{ 117 Upper_M2_ectoflexus ectoflexus_absent single_ectoflexus_present_labial_to_mesostyle single_ectoflexus_present_between_mesostyle_and_parastyle_pre_ectoflexus_ single_ectoflexus_present_between_mesostyle_and_metastyle_postectoflexus_ pair_of_ectoflexi_present_one_between_mesostyle_and_parastyle_one_between_mesostyle_and_metastyle;
{ 118 Upper_M2_single_ectoflexus_development shallow_ectoflexus deep_ectoflexus;
{ 119 Upper_M2_double_ectoflexus_development both_shallow anterior_ectoflexus_deep_posterior_extoflexus_shallow. both_deep;
{ 120 Upper_M2_position_of_metacone metacone_in_normal_position metacone_shifted_lingually;
{ 121 Upper_M2_relative_length_of_postmetacrista_and_premetacrista postmetacrista_absent postmetacrista_shorter_that_premetacrista postmetacrista_length_subequal_to_premetacrista_length postmetacrista_much_longer_than_premetacrista_but_not_twice_as_long postmetacrista_2x_longer_than_premetacrista_or_longer;
{ 122 Upper_M2_orientation_of_postprotocrista oriented_distolabially_toward_metacone_metaconule_or_metastylar_region oriented_toward_midpoint_between_metastyle_metacone_and_hypocone_region oriented_anteroposteriorly_toward_hypocone_or_hypocone_region;
{ 123 Upper_M2_endoloph_presence absent present_approaches_postprotocrista_at_an_angle present_but_continuous_with_postprotocrista_as_a_single_straight_crest_along_lingual_side_of_tooth present_does_not_approach_postprotocrista_runs_lingualy;
{ 124 Upper_M2_endoloph_contact_with_postprotocrista postprotocrista_and_endoloph_at_an_angle postprotocrista_and_endoloph_at_an_angle_but_not_in_contact;
{ 125 Upper_M2_metaconule_presence metaconule_present absent;
{ 126 Upper_M2_hypocone_shelf_development hypocone_shelf_very_large_maximum_mesiodistal_lenght_equal_to_or_greater_than_distance_between_paracone_and_metacone hypocone_shelf_large_maximum_mesiodistal_length_greater_than_half_the_distance_between_paracone_and_metacone_but_not_100_of_that_distance hypocone_shelf_small_well_developed_and_clearly_distinct_from_tricon_maximum_mesiodistal_length_less_than_half_the_distance_between_the_paracone_and_metacone hypocone_shelf_very_small_present_as_a_cingulum_but_may_not_be_clearly_distinguished_from_the_trigon hypocone_shelf_absent;
{ 127 Upper_M2_hypocone_shelf_width narrower wider;
{ 128 Upper_M2_hypocone_development hypocone_absent hypocone_incipient_or_poorly_developed_but_not_entirely_absent hypocone_well_developed;
{ 129 Upper_M3_presence M3_present absent;
{ 130 Upper_M3_reduction little_reduced_M3_occlusal_area_75_of_M2_area_ moderately_reduced_in_length_and_or_width_M3_area_50_75_of_M2_area_ very_reduced_in_length_and_or_width_M3_area_is_25_but_50_of_M2_area_ extremely_reduced_10_M3_area_25_M2_area_ peglike_10_area_;
{ 131 Upper_M3_anterior_segment_size M3_anterior_segment_nearly_as_large_as_that_of_M2 much_smaller_than_that_of_M2;
{ 132 Upper_M3_parastyle_presence present absent;
{ 133 Upper_M3_parastyle_form conical crest;
{ 134 Upper_M3_parastyle_length short long;
{ 135 Upper_M3_parastyle_curvature straight curved;
{ 136 Upper_M3_paraconule_presence paraconule_present absent;
{ 137 Upper_M3_postmetacrista postmetacrista_present_W_shaped_ectoloph_complete_ postmetacrista_absent_ectoloph_N_shaped_or_V_shaped_;
{ 138 Upper_M3_premetacrista_development premetacrista_longer_than_postparacrista premetacrista_and_postparacrista_length_subequal premetacrista_one_half_to_three_quarters_the_length_of_the_postparacrista premetacrista_one_third_to_slightly_less_than_one_half_the_length_of_the_postparacrista premetacrista_present_but_less_than_one_third_the_length_of_the_postparacrista premetacrista_absent_;
{ 139 Upper_M3_metacone metacone_present_as_a_disinct_cusp metacone_indistinct_incorperated_into_premetacrista metacone_entirely_absent;
{ 140 Upper_M3_metastylar_fovea_presence fovea_present absent;
{ 141 Upper_M3_protocone_presence present absent;
{ 142 Upper_M3_hypocone_shelf_presence absent present;
{ 143 Lower_i1_presence i1_present absent;
{ 144 Lower_i1_morphology_of_cutting_edge lobed_bilobed_or_trilobed_or_with_four_lobes_ undulate_lobe_structure cutting_edge_roughly_straight_without_notches_or_grooves pointed peglike_no_real_cutting_edge;
{ 145 Lower_i1_number_of_lobes bilobed trilobed four_lobes;
{ 146 Lower_i1_trilobed_morphology three_lobes_of_equal_size mesial_lobe_very_small_middle_lobe_large_distal_lobe_intermediate_in_size mesial_lobe_large_middle_and_distal_small two_mesial_lobes_small_and_twinned_well_separated_from_a_larger_distal_lobe;
{ 147 Lower_i1_crown_proporitions width_greater_than_length length_and_width_subequal length_greater_than_width;
{ 148 Lower_i1_diastema_between_right_and_left_teeth absent diastema_present;
{ 149 Lower_i2_presence i2_present absent;
{ 150 Lower_i2_morphology_of_cutting_edge lobed_bilobed_or_trilobed_or_with_more_lobes_ cutting_edge_roughly_straight_without_notches_or_lobes pointed peglike_no_real_cutting_edge;
{ 151 Lower_i2_number_of_lobes bilobed trilobed four_lobes more_than_four;
{ 152 Lower_i1_and_i2_relative_size i2_conspicuously_smaller_than_i1 i1_and_i2_subequal_in_size i2_conspicuously_larger_than_i1;
{ 153 Lower_i1_and_i2_position i2_lateral_to_i1 i2_posterior_to_i1;
{ 154 Lower_i3_presence i3_present absent;
{ 155 Lower_i3_crown_height i3_height_noticably_less_than_i2_height i3_height_subequal_to_i2_height i3_height_noticably_greater_than_i2_height;
{ 156 Lower_incisor_alveoli_spacing alveoli_of_i1_and_i2_nearly_coalesced_small_gap_between_i2_and_i3 alveoli_of_i1_i2_and_i3_evenly_spaced;
{ 157 Lower_incisors_procumbent not_procumbent somewhat_procumbent more_procumbent;
{ 158 Lower_c_anterior_diastema absent diastema_present_between_canine_and_last_lower_incisor_i1_i2_or_i3_;
{ 159 Lower_c_tip_divergence lower_canines_not_laterally_divergent canines_laterally_divergent_shafts_slanted_outward_so_that_the_tip_of_each_tooth_lies_dorsal_or_dorsal_and_lateral_to_the_lateral_edge_of_the_root_where_the_tooth_enters_the_alveolus;
{ 160 Lower_c_space_between_base_of_left_and_right_canines lower_canines_well_separated_from_one_another_at_the_base bases_of_right_and_left_canines_adjacent_or_nearly_so_but_not_in_contact bases_of_right_and_left_canines_adjacent_and_in_contact;
{ 161 Lower_c_shape extremely_short_premolariform_ short_and_stocky tall_and_lancoelate exceptionally_slender_with_a_subterete_shaft bladelike;
{ 162 Lower_c_anterior_cuspule_presence absent anterior_cuspule_present;
{ 163 Lower_c_posterior_cingulid cingulid_absent cingulid_present_but_small cingulid_broad;
{ 164 Lower_c_posterobasal_cusp absent weakly_developed strongly_developed;
{ 165 Lower_c_labially_swollen not lower_c_labially_swollen;
{ 166 Lower_c_labial_cingulum labial_cingulum_absent weakly_developed well_developed;
{ 167 Lower_c_labial_cingular_structures present absent;
{ 168 Lower_p1_presence_ p1_present absent;
{ 169 Lower_p1_number_of_roots one_root two_roots;
{ 170 Lower_p1_shape large_and_cuspidate peg_like_with_flattened_crown tiny_spicule_with_undifferentiated_crown;
{ 171 Lower_p1_distal_cuspule absent cuspule_present;
{ 172 Lower_p1_and_p4_relative_crown_length p1_longer_than_p4 subequal p1_shorter_than_p4;
{ 173 Lower_p4_presence p4_present absent;
{ 174 Lower_p4_number_of_roots three_roots two_roots one_root;
{ 175 Lower_p4_orientation_of_roots_when_two_are_present two_roots_oriented_longitudinally_with_resepct_to_the_long_axis_of_the_tooth_row two_roots_oriented_slightly_obliquely two_roots_oriented_stongly_obliquely_to_the_long_axis_of_the_toothrow;
{ 176 Lower_p4_alignment_within_toothrow p4_aligned_in_row_with_surrounding_teeth_when_seen_in_occlusal_view p4_lingually_displaced_from_toothrow_not_in_line_with_other_teeth p4_labially_displaced_from_toothrow_not_in_line_with_other_teeth;
{ 177 Lower_p4_anterior_diastema no_diastema_between_p4_and_next_adjacent_anterior_tooth_p1_or_C_ conspicuous_diastema_present;
{ 178 Lower_p4_overall_morphology p4_tribosphenic_with_a_distinct_trigonid_and_talonid p4_premolariform_with_cusps_but_not_arranged_in_tribosphenic_pattern p4_peglike_or_nearly_featureless;
{ 179 Lower_p4_anterolingual_cuspule absent cuspule_present;
{ 180 Lower_p4_lingual_cuspule absent cuspule_present;
{ 181 Lower_p4_distal_cuspule absent cuspule_present;
{ 182 Lower_p4_posterior_crests two_posterior_crests_separated_by_a_concavity only_one_posterior_crest_present_;
{ 183 Lower_p4_occlusal_outline long_and_strongly_laterally_compressed_length_width_or_1.7_ short_and_broad_length_width_1.7_;
{ 184 Lower_p4_labial_cingulid_development labial_cingulid_well_developed weakly_developed absent;
{ 185 Lower_p4_and_p5_relative_crown_height p4_much_taller_than_p5 p4_slightly_taller_than_p5 p4_and_p5_subequal_in_height p4_slightly_shorter_than_p5 p4_very_small_much_shorter_than_p5;
{ 186 Lower_p4_and_p5_relative_crown_length crown_length_of_p4_greater_than_length_of_p5 p4_and_p5_subequal_in_length p4_length_less_than_p5_length_but_more_than_one_half_the_length_of_p5 p4_less_than_or_equal_to_one_half_the_length_of_p5;
{ 187 Lower_p4_and_p5_crown_morphology crown_morphology_of_p4_and_p5_similar p4_and_p5_with_different_crown_morphologies;
{ 188 Lower_p5_number_of_roots three_roots two_roots one_root;
{ 189 Lower_p5_orientation_of_roots_when_two_are_present two_roots_oriented_longitudinally_with_resepct_to_the_long_axis_of_the_tooth_row two_roots_oriented_slightly_obliquely_ two_roots_oriented_stongly_obliquely_to_the_long_axis_of_the_toothrow;
{ 190 Lower_p5_paraconid_twinning Paraonid_either_absent_or_single_cusp_present Twinned_cusps_present_in_paraconid_position;
{ 191 Lower_p5_paraconid paraconid_large_and_high small_and_low very_low cusp_absent;
{ 192 Lower_p5_paracristid_presence paracristid_present absent;
{ 193 Lower_p5_lingual_cingulid absent partial_lingual_cingulum_present complete_lingual_cingulum_present;
{ 194 Lower_p5_labial_cingulid_development labial_cingulid_strongly_developed weakly_developed absent;
{ 195 Lower_p5_labial_cingulid_form straight undulate;
{ 196 Lower_p5_labial_cingulum_thickness cingulum_of_constant_thickness_throughout_length thicker_toward_distal_end;
{ 197 Lower_p5_presence_of_lingual_lobe absent present;
{ 198 Lower_p5_extension_of_lingual_lobe lingual posterior;
{ 199 Lower_p5_lingual_lobe_cusp absent present;
{ 200 Lower_p5_lingual_cuspule absent Cuspule_present;
{ 201 Lower_p5_metaconid absent one_metaconid two_metaconids;
{ 202 Lower_p5_metaconid_development metaconid_large metaconid_present_but_small;
{ 203 Lower_p5_protocristid absent one_protocristid two_protocristids;
{ 204 Lower_p5_postmetacristid absent short long;
{ 205 Lower_p5_talonid_length talonid_long talonid_short absent;
{ 206 Lower_p5_protoconid_development less_robust_taller_sharper more_robust_shorter_more_blunt extremely_short;
{ 207 Lower_p5_mesial_cuspule absent cuspule_present;
{ 208 Lower_p5_overall_morphology p5_triosphenic_with_distinct_trigonid_and_talonid p5_premolariform_with_cusps_but_not_arranged_in_tribosphenic_pattern p5_without_distinct_cusps_may_be_nearly_featureless_or_peglike;
{ 209 Lower_p5_and_m1_relative_length p5_and_m1_subequal_in_length p5_length_less_than_m1_length_but_more_than_three_quarters_the_length_of_m1 p5_length_more_than_one_half_but_less_than_three_quarters_the_length_of_m1 p5_length_less_than_or_equal_to_one_half_the_length_of_m1;
{ 210 Lower_molar_cusp_morphology cusps_well_individualized_concial_or_comprised_of_crests_that_meet_to_form_a_sharp_point cusps_not_well_individualized_not_very_conical_or_pointed;
{ 211 Lower_molars_lingual_cingulid_presence absent lingual_cingulid_present;
{ 212 Lower_molars_trigonid_fovea trigonid_fovea_closed trigonid_fovea_open_lingually;
{ 213 Lower_molars_position_of_hypoconulid hypoconuiid_located_on_distal_border_of_talonid_midway_between_hyponid_and_entoconid_ hypoconulid_located_on_distolabial_border_of_talonid_well_separated_from_entoconid_closer_to_midway_point_than_to_entoconid_ hypoconulid_located_on_distolabial_border_of_talonid_well_separated_from_entoconid_but_closer_to_entoconid_than_to_midway_point hypoconulid_located_on_labial_border_of_talonid_immediately_posterior_to_and_directly_adacent_to_the_entoconid_hypoconulid_and_entoconid_may_be_partially_fused_at_their_bases_twinning_of_hypoconuilid_and_entoconid_.;
{ 214 Lower_molars_nyctalodont_or_myotodont nyctalodont myotodont;
{ 215 Lower_molars_with_cristid_between_entoconid_and_midline_hypoconulid cristid_present absent;
{ 216 Lower_molars_talonid_basin_depth basin_absent shallow deep;
{ 217 Lower_molars_talonid_anteroposterior_compression not talonid_anteroposteriorly_compressed;
{ 218 Lower_molars_lingual_cusp_relative_height relatively_low_ relatively_high_lingual_cusps_at_least_75_height_of_labial_cusps_;
{ 219 Lower_molars_notches_in_cristid_obliqua_and_postcristid notches_absent notches_weakly_developed notches_strongly_developed_carnassia_like;
{ 220 Lower_molars_notches_in_paracristid_and_protocristid Notches_absent Notches_weakly_developed Notches_strongly_developed;
{ 221 Lower_molars_cristid_obliqua_curature_or_flexion straight_or_gently_curved_labially gently_curved_lingually flexed_sharply_lingually;
{ 222 Lower_molars_orientation_of_cristid_obliqua_ towards_protoconid directed_toward_a_point_in_between_protoconid_and_metaconid towards_metaconid;
{ 223 Lower_molars_cristid_obliqua_termination_on_metaconid cristid_obliqua_terminates_at_base_of_metaconid cristid_obliqua_extends_up_flank_of_metaconid;
{ 224 Lower_molars_groove_paralleling_cristid_obliqua absent groove_present;
{ 225 Lower_molars_entocristid_flexion not labially_flexed;
{ 226 Lower_molars_entocristid_distrupted entocristid_contacts_postvalid_thus_closing_off_lingual_side_of_talonid_basin entocristid_short_disrupted_so_that_talonid_basin_drains_lingually entocristid_absent;
{ 227 Lower_molars_height_of_protoconid_and_hypoconid not unusually_tall_and_robust;
{ 228 Lower_molars_protoconid_and_hypoconid_anteroposteriorly_compressed not_compressed protoconid_and_hypoconid_anteroposteriorly_compressed;
{ 229 Lower_molars_protoconid_and_hypoconid_ventral_extension_of_base not protoconid_and_hypoconid_with_ventral_extension_of_labial_cusp_base;
{ 230 Lower_molars_protoconid_and_hypoconid_buccal_bulging absent prononounced_buccal_bulging_present;
{ 231 Lower_m1_and_m2_extent_of_cristid_obliqua does_not_reach_trigonid reaches_trigonid;
{ 232 Lower_m1_and_m2_hypoconulid_size large small_and_low absent;
{ 233 Lower_m1_and_m2_entocristid_height low_crest high_crest;
{ 234 Lower_m1_and_m2_relative_length m1_longer_than_m2 m1_and_m2_subequal m1_shorter_than_m2;
{ 235 Lower_m1_relative_height_of_protoconid_and_hypoconid protoconid_markedly_higher_than_hypoconid protoconid_slightly_higher_than_hypoconid protoconid_and_hypoconid_subequal_in_height protoconid_slightly_smaller_than_hypoconid;
{ 236 Lower_m1_protoconid_height_compared_to_subsequent_molars m1_protoconid_higher_than_m2_or_m3_protoconid m1_protoconid_subequal_in_height_to_protoconids_on_m2_and_m3 m1_protoconid_noticably_shorter_than_protoconids_on_m2_and_m3;
{ 237 Lower_m1_paraconid_presence paraconid_present_on_m1 absent;
{ 238 Lower_m1_metaconid_presence metaconid_present_on_m1 absent;
{ 239 Lower_m1_relative_height_of_paraconid_and_metaconid paraconid_markedly_taller_than_metaconid cusps_subequal_in_height paraconid_markedly_shorter_than_metaconid;
{ 240 Lower_m1_presence_of_metacristid present absent;
{ 241 Lower_m1_paracristid_and_metacristid_relative_length paracristid_markedly_shorter_that_metacristid paracristid_and_metacristid_subequal_in_length paracristid_markedly_longer_than_metacristid;
{ 242 Lower_m1_entocristid_accessory_cusp absent present;
{ 243 Lower_m1_entoconid_development strongly_developed_tall weakly_developed_low entoconid_absent;
{ 244 Lower_m1_labial_cingulid_development strongly_developed weakly_developed absent;
{ 245 Lower_m1_labial_cingulid_completeness labial_cingulid_complete incomplete_posteriorly incomplete_anteriorly;
{ 246 Lower_m1_precingulum absent present;
{ 247 Lower_m1_precingulid_and_labial_cingulid_connection not_connected cingulids_confluent_around_mesiolabial_corner_of_tooth;
{ 248 Lower_m1_alignment_of_lingual_cusps paraconid_metaconid_and_entoconid_aligned_in_a_straight_line_ paraconid_situated_labial_to_a_line_drawn_through_the_metaconid_and_entoconid;
{ 249 Lower_m1_angle_between_protoconid_and_metaconid large_angle intermediate_angle small_angle;
{ 250 Lower_m1_talonid_width talonid_wider_than_trigonid talonid_and_trigonid_subequal talonid_narrower_than_trigonid;
{ 251 Lower_m1_hypoflexid_depth deep shallow absent;
{ 252 lower_m1_length_width_ratio 1.10_1.44 1.45_1.74 1.75_2.04 2.05_2.19 2.20_2.70 3.00_4.60;
{ 253 Lower_m2_and_m3_relative_height_of_paraconid_and_metaconid subequal_in_height paraconid_slightly_shorter_than_metaconid paraconid_markedly_shorter_than_metaconid;
{ 254 Lower_m2_and_m3_precingulum absent present;
{ 255 Lower_m2_and_m3_precingulid_and_labial_cingulid_connected. not_connected cingulids_confluent_around_mesiolabial_corner_of_tooth;
{ 256 Lower_m2_presence m2_present absent;
{ 257 Lower_m2_crown_morphology m2_with_crown_structure_resembling_m1 simplified_cuspidate_structure_compared_to_m1 m2_peg_like_with_flattened_crown;
{ 258 Lower_m2_height_of_trigonid_relative_to_talonid_cusps protoconid_markedly_higher_than_hypoconid protoconid_slightly_higher_than_hypoconid protoconid_and_hypoconid_subequal_in_height;
{ 259 Lower_m2_labial_cingulid_development strongly_developed weakly_developed absent;
{ 260 Lower_m2_labial_cingulid_completeness labial_cingulid_complete incomplete_posteriorly incomplete_anteriorly;
{ 261 Lower_m2_entoconid_development strongly_developed_tall weakly_developed_low very_weak_small absent;
{ 262 Lower_m2_talonid_width talonid_wider_than_trigonid talonid_and_trigonid_subequal talonid_narrower_than_trigonid;
{ 263 Lower_m2_hypoflexid_depth deep shallow absent;
{ 264 Lower_m3_presence m3_present absent;
{ 265 Lower_m3_crown_morphology m3_crown_morphology_similar_to_that_of_m2 m3_markedly_different_from_m2;
{ 266 Lower_m3_length m3_length_subequal_to_that_of_m2 m3_slightly_shorter_75_than_m2 m3_length_much_less_than_m2;
{ 267 Lower_m3_number_of_roots 2_roots 1_root;
{ 268 Lower_m3_labial_cingulid_development strongly_developed weakly_developed absent;
{ 269 Lower_m3_labial_cingulid_completeness labial_cingulid_complete incomplete_posteriorly incomplete_anteriorly;
{ 270 Lower_m3_extent_of_cristid_obliqua reaches_trigon present_but_does_not_reach_trigon cristid_obliqua_absent;
{ 271 Lower_m3_hypoconid_presence present absent;
{ 272 Lower_m3_height_of_protoconid_relative_to_hypoconid protoconid_notably_higher_than_hypoconid protoconid_slightly_higher_than_hypoconid protoconid_and_hypoconid_subequal_in_height protoconid_smaller_than_hypoconid;
{ 273 Lower_m3_hypoflexid_depth absent shallow deep;
{ 274 Lower_m3_entocristid_orientation transverse_to_long_axis_of_tooth oblique_to_long_axis_of_tooth parallel_to_long_axis_of_tooth;
{ 275 Lower_m3_presence_of_postcristid present absent;
{ 276 Lower_m3_postcristid_orientation directed_posterolabially_at_an_oblique_angle_to_the_long_axis_of_the_tooth perpendicular_to_the_long_axis_of_the_tooth;
{ 277 Lower_m3_hypoconulid_presence present absent;
{ 278 Lower_m3_hypoconulid_size large small_and_low;
{ 279 Lower_m3_talonid_width talonid_wider_than_trigonid talonid_and_trigonid_subequal talonid_narrower_than_trigonid;
;


ccode  - 0.10 12.279 + 11;


;
