# Supplementary material for: 33 million year old Myotis (Chiroptera, Vespertilionidae) and the rapid global radiation of modern bats
Source: PLoS One. 2017 Mar 8;12(3):e0172621. doi: 10.1371/journal.pone.0172621 (PMC5342209; doi:10.1371/journal.pone.0172621)
Supplement: S3 File — (XLSX) [file pone.0172621.s003.xlsx]

## Sheet: Sheet1
Order	Family	Genus	E.Pal	M.Pal	L.Pal	E.Eo	M.Eo	L.Eo	E.Oligo	L.Oligo	E.Mio	M.Mio	L.Mio	E.Plio	L.Plio	E.Pleisto	M.Pleisto	L.Pleisto	Holo
Cingulata	Dasypoididae				X
		Dasypus													X
		Chaetophractus												X
		Zaedyus													X
		Euphractus															X
		Chlamyphorus																X
		Tolypeutes												X
		Cabassous															X
		Priodontes																	X
Pilosa	Myrmecophagidae										X
		Myrmecophaga												X
		Tamandua																X
	Cyclopedidae												X
		Cyclopes																	X
	Megalonychidae										X
		Choloepus																	X
	Bradypodidae																		X
		Bradypus																	X
Macroscelidea	Macroscelididae						X
		Macroscelides													X
		Elephantulus													X
		Petrodromus																	X
		Rhynchocyon									X
Lagomorpha	Ochotonidae							X
		Ochotona											X
	Leporidae					X
		Oryctolagus												X
		Pentalagus																X
		Pronolagus												X
		Lepus												X
		Sylvilagus													X
		Caprolagus													X
		Bunolagus															X
		Brachylagus																X
		Poelagus																	X
		Nesolagus																	X
		Romerolagus																	X
Rodentia	Aplodontidae									X
		Aplodontia																X
	Sciuridae							X
		Sciurotamias											X
		Rheithrosciurus																	X
		Sciurus										X
		Microsciurus																	X
		Sciurillus																	X
		Atlantoxerus									X
		Xerus												X
		Spermophilopsis																	X
		Marmota											X
		Spermophilus										X
		Ammospermophilus											X
		Cynomys										X
		Tamias									X
		Ratufa									X
		Dremomys											X
		Callosciurus											X
		Tamiops											X
		Glyphotes																	X
		Rhinosciurus																	X
		Lariscus																	X
		Menetes																	X
		Prosciurillus																	X
		Sundasciurus																	X
		Rubrisciurus																	X
		Nannosciurus																	X
		Hyosciurus																	X
		Heliosciurus																X
		Protoxerus																	X
		Epixerus																	X
		Paraxerus												X
		Funisciurus																	X
		Myosciurus																	X
		Tamiasciurus															X
		Pteromys													X
		Hylopetes											X
		Eoglaucomys																	X
		Petinomys											X
		Petaurista														X
		Glaucomys															X
		Aeretes														X
		Eupetaurus																	X
		Petaurillus																	X
		Belomys													X
		Trogopterus														X
		Aeromys																	X
		Pteromyscus																	X
		Biswamoyopterus																	X
		Olisthomys																	X
		Iomys																	X
	Castoridae							X
		Castor											X
	Dipodidae					X
		Sicista											X
		Eozapus											X
		Zapus												X
		Napaeozapus															X
		Allactaga										X
		Pygeretmus													X
		Allactodipus																	X
		Jaculus													X
		Ermodipus																	X
		Dipus																X
		Stylodipus																X
		Cardiocranius																	X
		Salpingotus																	X
		Paradipus																	X
		Euchoreutes																	X
	Muridae						X
		Baiomys												X
		Scotinomys																	X
		Rhagomys																	X
		Otonyctomys																	X
		Nyctomys																	X
		Tylomys																	X
		Ototylomys																	X
		Neotoma											X
		Xenomys																	X
		Hodomys																	X
		Nelsonia																	X
		Peromyscus											X
		Reithrodontomys												X
		Onychomys												X
		Neotomodon																X
		Ochrotomys																X
		Podomys																X
		Isthmomys																	X
		Megadontomys																	X
		Habromys																	X
		Osgoodomys																	X
		Oryzomys											X
		Nesoryzomys																	X
		Melanomys																	X
		Sigmodontomys																	X
		Nectomys																X
		Amphinectomys																	X
		Oligoryzomys																X
		Neacomys																	X
		Zygodontomys																X
		Lundomys																X
		Holochilus															X
		Pseudoryzomys																X
		Microakodontomys																	X
		Oecomys																	X
		Microryzomys																	X
		Scolomys																	X
		Chilomys																	X
		Abrawayaomys																	X
		Delomys																X
		Thomasomys																	X
		Wilfredomys																	X
		Aepeomys																	X
		Phaenomys																	X
		Rhipidomys																X
		Wiedomys																	X
		Akodon													X
		Bolomys													X
		Podoxymys																	X
		Thalpomys																	X
		Abrothrix																	X
		Chroeomys																	X
		Chelemys																	X
		Notiomys																	X
		Pearsonomys																	X
		Geoxus																	X
		Blarinomys																X
		Juscelinomys																X
		Oxymycterus															X
		Lenoxus																	X
		Calomys																X
		Eligmodontia																X
		Graomys													X
		Salinomys																	X
		Phyllotis																X
		Loxodontomys																	X
		Auliscomys													X
		Galenomys																	X
		Chinchillula																	X
		Punomys																	X
		Andinomys																X
		Irenomys																	X
		Euneomys														X
		Neotomys																	X
		Reithrodon													X
		Sigmodon												X
		Scapteromys													X
		Kunsia																X
		Bibimys																X
		Neusticomys																	X
		Rheomys																	X
		Anotomys																	X
		Chibchanomys																	X
		Ichthyomys																	X
		Calomyscus											X
		Cricetus										X
		Cricetulus											X
		Mesocricetus												X
		Phodopus																X
		Tscherskia													X
		Cansumys																	X
		Allocricetulus																	X
		Arvicola														X
		Microtus													X
		Lemmiscus															X
		Blanfordimys																	X
		Chionomys															X
		Proedromys																X
		Volemys																	X
		Lagurus													X
		Eolagurus															X
		Ondatra													X
		Phenacomys														X
		Dinaromys														X
		Hyperacrius														X
		Alticola																X
		Eothenomys													X
		Clethrionomys													X
		Phaulomys																X
		Prometheomys																X
		Ellobius													X
		Synaptomys												X
		Lemmus														X
		Myopus																X
		Neofiber															X
		Dicrostonyx														X
		Lophiomys													X
		Brachytarsomys																X
		Macrotarsomys																X
		Nesomys																	X
		Gymnuromys																	X
		Eliurus																	X
		Brachyuromys											X
		Hypogeomys																	X
		Saccostomus												X
		Beamys																	X
		Cricetomys																	X
		Delanymys													X
		Mystromys											X
		Petromyscus											X
		Gerbillus											X
		Microdillus																	X
		Meriones														X
		Rhombomys													X
		Psammomys																X
		Sekeetamys																	X
		Brachiones																	X
		Desmodilliscus																X
		Pachyuromys																	X
		Tatera												X
		Taterillus													X
		Desmodillus																X
		Gerbillurus																	X
		Ammodillus																	X
		Dendromus											X
		Steatomys										X
		Malacothrix													X
		Megadendromus																	X
		Dendroprionomys																	X
		Prionomys																	X
		Deomys																	X
		Leimacomys																	X
		Acomys												X
		Uranomys																	X
		Lophuromys																	X
		Millardia														X
		Cremnomys																	X
		Diomys																	X
		Micromys											X
		Vandeleuria														X
		Vernaya													X
		Chiropodomys													X
		Haplomys													X
		Apodemus											X
		Tokudaia																X
		Mus											X
		Muriculus																	X
		Hadromys														X
		Golunda													X
		Pelomys												X
		Desmomys																	X
		Mylomys																	X
		Arvicanthis												X
		Lemniscomys													X
		Rhabdomys													X
		Otomys													X
		Parotomys															X
		Dasymys													X
		Lamottemys																	X
		Oenomys													X
		Thamnomys																X
		Thallomys												X
		Grammomys													X
		Aethomys												X
		Stochomys																	X
		Dephomys																	X
		Hybomys																	X
		Heimyscus																	X
		Zelotomys													X
		Colomys																X
		Nilopegamys																	X
		Stenocephalemys																	X
		Praomys													X
		Mastomys																	X
		Hylomyscus																	X
		Malacomys																	X
		Rattus														X
		Nesokia													X
		Bandicota																	X
		Berylmys														X
		Diplothrix																X
		Sundamys
		Palawanomys																	X
		Kadarsanomys																	X
		Tryphomys																	X
		Abditomys																	X
		Bullimus																	X
		Tarsomys																	X
		Limnomys																	X
		Taeromys																	X
		Paruromys																	X
		Papagomys																	X
		Komodomys																	X
		Bunomys																	X
		Paulamys																	X
		Stenomys																	X
		Maxomys																	X
		Leopoldamys													X
		Niviventer													X
		Chiromyscus																	X
		Srilankamys																	X
		Lenothrix																	X
		Pithecheir																	X
		Eropeplus																	X
		Lenomys																	X
		Margaretamys																	X
		Melasmothrix																	X
		Tateomys																	X
		Haeromys																	X
		Anonymomys																	X
		Echiothrix																	X
		Phloeomys																	X
		Crateromys																	X
		Batomys																	X
		Carpomys																	X
		Apomys																	X
		Rhynchomys																	X
		Crunomys																	X
		Archboldomys																	X
		Chrotomys																	X
		Pseudomys													X
		Notomys																X
		Conilurus														X
		Leporillus														X
		Mesembriomys																X
		Zyzomys																X
		Leggadina																X
		Xeromys																	X
		Hydromys																X
		Crossomys																	X
		Microhydromys																	X
		Parahydromys																	X
		Paraleptomys																	X
		Mayermys																	X
		Neohydromys																	X
		Pseudohydromys																	X
		Leptomys																	X
		Lorentzimys																	X
		Melomys																X
		Pogonomelomys																	X
		Coccymys																	X
		Uromys																X
		Solomys																	X
		Xenuromys																	X
		Hyomys																X
		Anisomys																X
		Mallomys																X
		Macruromys																	X
		Chiruromys																	X
		Pogonomys																	X
		Typhlomys											X
		Platacanthomys											X
		Myospalax													X
		Spalax													X
		Nannospalax												X
		Tachyoryctes													X
		Rhizomys													X
		Cannomys																	X
	Myoxidae					X
		Graphiurus													X
		Eliomys										X
		Dryomys															X
		Selevinia																	X
		Myomimus									X
		Glirulus									X
		Myoxus								X
		Muscardinus										X
	Geomyidae								X
		Geomys											X
		Pappogeomys												X
		Orthogeomys																X
		Zygogeomys																	X
		Thomomys												X
		Liomys																X
		Heteromys																	X
		Perognathus									X
		Chaetodipus																	X
		Dipodomys													X
		Microdipodops																X
	Pedetidae										X
		Pedetes												X
	Anomaluridae							X
		Anomalurus										X
		Zenkerella									X
		Idiurus																	X
	Ctenodactylidae								X
		Pectinator												X
		Massouteria																	X
		Felovia																	X
		Ctenodactylus																	X
	Hystricidae									X
		Hystrix								X
		Atherurus														X
		Trichys															X
	Erethizontidae									X
		Erethizon													X
		Coendou																X
		Chaetomys																	X
	Petromuridae																	X
		Petromus																X
	Thyronomyidae							X
		Thyronomys													X
	Bathyergidae										X
		Cryptomys												X
		Georychus															X
		Heliophobius																	X
		Heterocephalus												X
	Agoutidae						X
		Myoprocta																	X
		Dasyprocta																	X
		Agouti																	X
	Dinomyidae										X
		Dinomys																	X
	Caviidae											X
		Galea																X
		Microcavia															X
		Cavia															X
		Kerodon																X
		Dolichotis														X
	Hydrochoeridae												X
		Hydrochaeris														X
	Octodontidae									X
		Pithanotomys												X
		Octomys																	X
		Tympanoctomys																	X
		Spalacopus																	X
		Octodontomys																	X
		Octodon																	X
		Ctenomys													X
	Echimyidae									X
		Thrichomys											X
		Proechimys																X
		Euryzygomatomys																X
		Carterodon																X
		Clyomys																X
		Lonchothrix																	X
		Hoplomys																	X
		Mesomys																	X
		Myocastor													X
		Kannabateomys																X
		Dactylomys																	X
		Olallamys																	X
		Echimys																X
		Isothrix																X
		Diplomys																	X
		Makalata																	X
	Capromyidae										X
		Capromys																X
		Geocapromys																X
		Plagiodontia																X
	Chinchillidae									X
		Lagostomus													X
		Lagidium																	X
		Chinchilla																	X
	Abrocomidae																		X
		Abrocoma																	X
Pholidota	Manidae						X
		Manis											X
		Smutsia												X
		Phataginus																	X
		Uromanis																	X
Carnivora	Felidae								X
		Neofelis																X
		Felis													X
		Lynx											X
		Puma													X
		Prionailurus														X
		Herpailurus														X
		Oreailurus																	X
		Leptailurus															X
		Leopardus																X
		Pardofelis																	X
		Otocolobus																	X
		Ictailurus																	X
		Microfelis																	X
		Profelis																	X
		Panthera														X
		Jaguarius												X
		Leo													X
		Tigris														X
		Uncia																X
		Acinonyx												X
	Viverridae							X
		Viverra									X
		Genetta										X
		Civettictis													X
		Viverricula													X
		Poiana																	X
		Osbornictis																	X
		Prionodon																	X
		Paguma															X
		Macrogalidia																	X
		Paradoxurus																	X
		Arctogalidia																	X
		Arctictis																	X
		Hemigaulus																	X
		Diplogale																	X
		Chrotogale																	X
		Cynogale																	X
		Eupleres																	X
		Fossa																	X
		Cryptoprocta																	X
	Herpestidae									X
		Herpestes								X
		Atilax											X
		Helogale													X
		Mungos													X
		Cynictis																X
		Ichneumia																X
		Suricata																X
		Crossarchus																	X
		Liberiictis																	X
		Rhynchogale																	X
		Bdeogale																	X
		Galidictis																	X
		Mungotictis																	X
		Salanoia																	X
		Galidia																	X
	Hyaenidae										X
		Hyaena										X
		Pachycrocuta											X
		Crocuta													X
		Proteles																X
		Nandinia																	X
	Canidae						X
		Vulpes													X
		Urocyon												X
		Otocyon															X
		Pseudalopex															X
		Lycalopex																X
		Chrysocyon													X
		Nyctereutes											X
		Atelocynus																	X
		Speothos																X
		Canis											X
		Cuon														X
		Lycaon															X
	Ursidae										X
		Tremarctos																X
		Ursus												X
		Melursus																X
		Helarctos															X
		Thalarctos																X
		Ailuropoda															X
	Otariidae											X
		Callorhinus											X
		Arctocephalus										X
		Eumetopias										X
		Otaria																X
		Zalophus													X
		Neophoca															X
		Phocarctos																X
	Phocidae										X
		Odobenus														X
		Phoca													X
		Erignathus																X
		Halichoerus																X
		Cystophora																	X
		Mirounga														X
		Monachus														X
		Ommatophoca													X
		Lobodon																X
		Hydrurga																	X
		Leptonychotes																	X
	Mustelidae								X
		Lutra											X
		Pteronura																X
		Lutrogale														X
		Aonyx											X
		Amblonyx																	X
		Enhydra														X
		Mydaus																	X
		Spilogale													X
		Mephitis													X
		Conepatus													X
		Martes									X
		Mustela											X
		Vormela													X
		Taxidea													X
		Lyncodon														X
		Poecilictis														X
		Galictis																X
		Ictonyx															X
		Poecilogale																	X
		Eira																	X
		Mellivora											X
		Gulo														X
		Meles												X
		Arctonyx														X
		Melogale																	X
		Bassariscus										X
		Bassaricyon																	X
		Potos																	X
		Nasua												X
		Procyon													X
		Nasuella																	X
		Ailurus																	X
Chrysochloridea	Chrysochloridae							X
		Chrysochloris													X
		Chrysospalax													X
		Amblysomus													X
		Chlorotalpa													X
		Cryptochloris																	X
		Eremitalpa																	X
Erinaceomorpha	Erinaceidae		X
		Echinosorex										X
		Hylomys											X
		Podogymnura																	X
		Erinaceus											X
		Hemiechinus										X
	Talpidae						X
		Uropsilus																	X
		Scaptonyx										X
		Talpa								X
		Scaptochirus												X
		Euroscaptor																	X
		Nesoscaptor																	X
		Scapanulus												X
		Parascalops															X
		Scapanus											X
		Urotrichus										X
		Neurotrichus											X
		Condylura											X
		Desmana												X
		Galemys												X
Soricomorpha	Solenodontidae																	X
		Solenodon																X
	Soricidae						X
		Blarinella										X
		Sorex											X
		Microsorex															X
		Notiosorex											X
		Anourosorex											X
		Soriculus											X
		Neomys													X
		Nectogale																	X
		Chimarrogale																	X
		Cryptotis											X
		Blarina													X
		Crocidura									X
		Myosorex													X
		Suncus													X
		Sylvisorex														X
		Diplomesodon													X
		Feroculus																	X
		Ruwenzorisorex																	X
		Solisorex																	X
		Paracrocidura																	X
Afrosoria	Tenrecidae										X
		Geogale																X
		Potamogale																	X
		Micropotamogale																	X
		Echinops																	X
		Tenrec																	X
		Hemicentetes																	X
		Setifer																	X
		Limnogale																	X
		Microgale																	X
		Oryzorictes																	X
Chiroptera	Pteropodidae							X
		Eidolon													X
		Rousettus																X
		Boneia																	X
		Myonycteris																	X
		Pteropus																X
		Acerodon																	X
		Pteralopex																	X
		Styloctenium																	X
		Neopteryx																	X
		Dobsonia																	X
		Aproteles																X
		Harpyionycteris																	X
		Plerotes																	X
		Hypsignathus																	X
		Epomops																	X
		Epomophorus																	X
		Micropteropus																	X
		Nanonycteris																	X
		Scotonycteris																	X
		Casinycteris																	X
		Cynopterus																	X
		Ptenochirus																	X
		Megaerops																	X
		Dyacopterus																	X
		Balionycteris																	X
		Chironax																	X
		Thoopterus																	X
		Sphaerias																	X
		Aethalops																	X
		Penthetor																	X
		Latidens																	X
		Alionycteris																	X
		Otopteropus																	X
		Haplonycteris																	X
		Paranyctimene																	X
		Nyctimene																	X
		Eonycteris																X
		Magaloglossus																	X
		Macroglossus																	X
		Syconycteris																	X
		Melonycteris																	X
		Notopteris																	X
	Emballonuridae						X
		Taphozous									X
		Saccolaimus																	X
		Mosia																	X
		Emballonura																X
		Coleura													X
		Rhynchonycteris																	X
		Centronycteris																	X
		Balantiopteryx																	X
		Saccopteryx																	X
		Cormura																	X
		Peropteryx																X
		Cyttarops																	X
		Diclidurus																	X
	Rhinopomatidae							X
		Rhinopoma											X
	Craseonycteridae																		X
		Craseonycteris																	X
	Megadermatidae							X
		Lavia																	X
		Cardioderma													X
		Megaderma								X
		Macroderma										X
	Nycteridae									X
		Nycteris													X
	Rhinolophidae					X
		Rhinolophus					X
	Hipposideridae						X
		Hipposideros					X
		Anthops																	X
		Aselliscus																	X
		Asellia									X
		Coelops									X
	Rhinonycteridae								X
		Rhinonicteris																	X
		Cloeotis																	X
		Triaenops																X
		Paratriaenops																	X
	Mystacinidae										X
		Mystacina									X
	Noctilionidae												X
		Noctilio											X
	Mormoopidae									X
		Pteronotus														X
		Mormoops																X
	Phyllostomidae											X
		Micronycteris																X
		Macrotus																X
		Lonchorhina																	X
		Macrophyllum																	X
		Tonatia																X
		Mimon																X
		Phyllostomus																X
		Phylloderma																	X
		Trachops																	X
		Chrotopterus																X
		Vampyrum																	X
		Brachyphylla																X
		Erophylla																X
		Phyllonycteris																X
		Glossophaga																X
		Monophyllus																X
		Lichonycteris																	X
		Leptonycteris																X
		Anoura																X
		Hylonycteris																	X
		Scleronycteris																	X
		Choeroniscus																	X
		Choeronycteris																	X
		Musonycteris																	X
		Lionycteris																	X
		Lonchophylla																	X
		Platalina																	X
		Carollia																X
		Rhinophylla																	X
		Sturnira																X
		Uroderma																	X
		Platyrrhinus																X
		Vampyrodes																	X
		Vampyressa																	X
		Mesophylla																	X
		Ectophylla																	X
		Artibeus																X
		Ardops																	X
		Phyllops																X
		Ariteus																X
		Stenoderma																X
		Pygoderma																	X
		Ametrida																	X
		Sphaeronycteris																	X
		Centurio																	X
		Diphylla																	X
		Diaemus																	X
		Desmodus														X
	Molossidae						X
		Tomopeas																	X
		Mormopterus								X
		Molossops																	X
		Myopterus																	X
		Cheiromeles																X
		Tadarida						X
		Chaerephon																X
		Mops										X
		Otomops																	X
		Nyctinomops																	X
		Eumops													X
		Promops																X
		Molossus																X
	Natalidae					X
		Natalus																X
		Chilonatalus																X
		Nyctiellus																X
	Furipteridae																	X
		Furipterus																X
		Amorphochilus																X
	Thyropteridae																	X
		Thyropterus																X
	Myzopodidae							X
		Myzopoda														X
	Vespertilionidae						X
		Myotis							X
		Lasionycteris												X
		Barbastella														X
		Euderma																	X
		Idionycteris																	X
		Plecotus											X
		Eudiscopus																	X
		Pipistrellus									X
		Nyctalus														X
		Ia																	X
		Glischropus																	X
		Eptesicus									X
		Vespertilio									X
		Laephotis																	X
		Histiotis													X
		Philetor																	X
		Tylonycteris																	X
		Mimetillus																	X
		Hesperoptenus															X
		Chalinolobus																X
		Nycticeius														X
		Rhogeessa																	X
		Scotoecus														X
		Scotomanes																	X
		Otonycteris																	X
		Lasiurus												X
		Bauerus																	X
		Antrozous											X
		Nyctophilus																X
		Pharotis																	X
		Murina															X
		Harpiocephalus																	X
		Kerivoula																	X
	Miniopteridae										X
		Miniopterus									X
Dermoptera	Galeopithecidae							X
		Cynocephalus																	X
Primates	Daubentoniidae																		X
		Daubentonia																	X
	Lemuridae																		X
		Lepilemur																	X
		Hapalemur																	X
		Lemur																	X
		Varecia																	X
		Eulemur																	X
	Lorisidae							X
		Pseudopotto																	X
		Galago													X
		Euoticus																	X
		Nycticebus																	X
		Perodicticus																	X
		Arctocebus																	X
		Loris																	X
	Cheirogaleidae																		X
		Allocebus																	X
		Microcebus																	X
		Cheirogaleus																	X
		Phaner																	X
	Indridae																		X
		Indri																	X
		Propithecus																	X
		Avahi																	X
	Tarsiidae						X
		Tarsius					X
	Cercopithecidae										X
		Colobus											X
		Presbytis											X
		Pygathrix																X
		Nasalis																	X
		Macaca											X
		Theropithecus												X
		Papio												X
		Cercocebus													X
		Cercopithecus													X
		Allenopithecus																	X
		Erythrocebus																	X
	Hominidae									X
		Pongo										X
		Pan																	X
		Gorilla																	X
		Homo													X
		Hylobates										X
	Callitrichidae											X
		Leontopithecus																	X
		Saguinus																	X
		Callithrix																	X
		Cebuella																	X
		Callimico																	X
	Atelidae										X
		Saimiri										X
		Cebus																X
		Aotus										X
		Callicebus																X
		Pithecia																	X
		Chiropotes																	X
		Cacajao																	X
		Ateles																X
		Brachyteles																	X
		Lagothrix																	X
		Alouatta																X
Scandentia	Tupaiidae						X
		Tupaia											X
		Anathana																	X
		Dendrogale																	X
		Urogale																	X
		Ptilocercus																	X
Tubulidentata	Orycteropodidae									X
		Orycteropus										X
Cete	Balaenopteridae									X
		Balaenoptera										X
		Megaptera											X
		Eschrichtius																X
	Balaenidae											X
		Balaena												X
		Caperea																	X
	Physeteridae										X
		Physeter									X
		Kogia													X
	Hyperoodontidae									X
		Mesoplodon										X
		Hyperoodon													X
		Ziphius												X
		Berardius																	X
		Tasmacetus																	X
		Indopacetus																	X
	Platanistidae										X
		Platanista																	X
	Delphinidae									X
		Orcinus								X
		Pseudorca												X
		Delphinus										X
		Tursiops										X
		Lagenorhynchus												X
		Steno													X
		Lissodelphis																X
		Lagenodelphis																	X
		Stenella																	X
		Globicephala												X
		Grampus																	X
		Peponocephala																	X
		Feresa																	X
		Cephalorhynchus																	X
		Sotalia																	X
		Sousa																	X
	Pontoporiidae											X
		Pontoporia											X
	Lipotidae												X
		Lipotes																	X
	Iniidae										X
		Inia																	X
	Monodontidae										X
		Delphinapterus										X
		Monodon																X
		Orcaella																	X
	Phocoenidae												X
		Phocoenoides																	X
		Australophocaena																	X
		Neophocaena																	X
		Phocoena																	X
Artiodactyla	Suidae							X
		Sus										X
		Potamochoerus										X
		Hylochoerus														X
		Phacochoerus													X
		Babyrousa																X
	Tayassuidae							X
		Tayassu													X
		Catagonus															X
	Hippopotamidae											X
		Hexaprotodon											X
		Hippopotamus													X
	Camelidae						X
		Lama													X
		Vicugna															X
		Camelus											X
	Tragulidae										X
		Tragulus													X
		Hyemoschus																X
	Moschidae								X
		Moschus											X
	Antilocapridae										X
		Antilocapra																X
	Cervidae										X
		Hydropotes																	X
		Muntiacus											X
		Elaphodus															X
		Cervus												X
		Axis											X
		Elaphurus														X
		Dama														X
		Capreolus													X
		Alces															X
		Odocoileus												X
		Ozotoceros													X
		Blastocerus														X
		Mazama																X
		Pudu																X
		Rangifer														X
		Hippocamelus														X
	Giraffidae										X
		Okapia														X
		Giraffa											X
	Bovidae									X
		Pelea														X
		Gazella									X
		Antilope											X
		Antidorcas													X
		Pantholops																X
		Litocranius															X
		Saiga															X
		Ammodorcas																	X
		Raphicerus												X
		Madoqua												X
		Oreotragus													X
		Ourebia														X
		Neotragus																X
		Dorcatragus																	X
		Capra											X
		Ovis													X
		Hemitragus													X
		Ammotragus																X
		Rupicapra															X
		Oreamnois																X
		Pseudois																	X
		Budorcas																X
		Ovibos															X
		Naemorhedus																X
		Capricornis																X
		Pseudoryx																	X
		Boselaphus																X
		Tetracerus																X
		Syncerus													X
		Bos													X
		Bubalus													X
		Bison														X
		Anoa																X
		Tragelaphus											X
		Taurotragus													X
		Boocercus																	X
		Redunca											X
		Kobus												X
		Hippotragus													X
		Oryx													X
		Addax																	X
		Alcelaphus													X
		Connochaetes													X
		Damaliscus													X
		Sigmoceros																X
		Aepyceros												X
		Cephalophus													X
		Sylvicapra															X
Perissodactyla	Equidae					X
		Equus												X
	Rhinocerotidae						X
		Dicerorhinus								X
		Rhinoceros											X
		Ceratotherium											X
		Diceros											X
	Tapiridae								X
		Tapirus											X
Hyracoidea	Procaviidae										X
		Procavia												X
		Heterohyrax											X
		Dendrohyrax															X
Sirenia	Dugongidae					X
		Dugong																	X
	Trichechidae											X
		Trichechus													X
Proboscidea	Elephantidae										X
		Loxodonta											X
		Elephas											X
